# Supplementary material for: Activator Protein-1 Transcriptional Activity Drives Soluble Micrograft-Mediated Cell Migration and Promotes the Matrix Remodeling Machinery
Source: Hindawi journal article supplement (doi:10.1155/2019/6461580), 2019-12-31
Supplement: f1 [file 6461580.f1.pdf]

| MOUSE        |                         |                         |
|--------------|-------------------------|-------------------------|
| GENE         | FORWARD SEQUENCE        | REVERSE SEQUENCE        |
| <i>Fos</i>   | GGGAATGGTGAAGACCGTGTCA  | GCAGCCATCTTATTCCGTTCCC  |
| <i>Fosb</i>  | ACCTGTCTTCGGTGGACTCCTT  | TGGCTGGTTGTGATTGCGGTGA  |
| <i>Fosl1</i> | CCGAAGAAAGGAGCTGACAGAC  | CTCAAGGCGTTCCTTCTGCTTC  |
| <i>Fosl2</i> | AGGAGGAGAAGCGTCCGAATCCG | CCAGACTTCTCCTCTTCCAGCT  |
| <i>Jun</i>   | CAGTCCAGCAATGGGCACATCA  | GGAAGCGTGTCTGGCTATGCA   |
| <i>Junb</i>  | GACCTGCACAAGATGAACCACG  | ACTGCTGAGGTTGGTGTAGACG  |
| <i>Jund</i>  | ACCTGCACAAGCAAAGCCAGCT  | CGAAACTGCTCAGGTTGGCGTA  |
| <i>Mmp1a</i> | AGGAAGGCGATATTGTGCTCTCC | TGGCTGGAAAGTGTGAGCAAGC  |
| <i>Mmp1b</i> | GCAGTTGTGGAAGATGCCATCG  | CCATCAAATGTGTAGAAGTCACC |
| <i>Mmp9</i>  | GGACCCGAAGCGGACATTG     | CGTCGTCGAAATGGGCATCT    |
| <i>Mmp10</i> | TGCTGCCTATGAGGCTCACAAC  | GGAGGAAAACCGAGAGTGTGGA  |
| <i>Mmp12</i> | CACACTTCCCAGGAATCAAGCC  | TTTGGTGACACGACGGAACAGG  |
| <i>Mmp13</i> | GATGACCTGTCTGAGGAAGACC  | GCATTTCTCGGAGCCTGTCAAC  |
| HUMAN        |                         |                         |
| GENE         | FORWARD SEQUENCE        | REVERSE SEQUENCE        |
| <i>FOS</i>   | GCCTCTTACTACCACTCACC    | AGATGGCAGTGACCGTGGGAAT  |
| <i>FOSB</i>  | TCTGTCTTCGGTGGACTCCTTC  | GTTGCACAAGCCACTGGAGGTC  |
| <i>FOSL1</i> | GGAGGAAGGAACTGACCGACTT  | CTCTAGGCGCTCCTTCTGCTTC  |
| <i>FOSL2</i> | AAGAGGAGGAGAAGCGTCGCAT  | GCTCAGCAATCTCCTTCTGCAG  |
| <i>JUN</i>   | CCTTGAAAGCTCAGAACTCGGAG | TGCTGCGTTAGCATGAGTTGGC  |
| <i>JUNB</i>  | CGATCTGCACAAGATGAACCACG | CTGCTGAGGTTGGTGTAAACGG  |
| <i>JUND</i>  | ATCGACATGGACACGCAGGAGC  | CTCCGTGTTCTGACTCTTGAGG  |
| <i>MMP1</i>  | ATGAAGCAGCCCAGATGTGGAG  | TGGTCCACATCTGCTCTTGGCA  |
| <i>MMP9</i>  | GCCACTACTGTGCCTTTGAGTC  | CCCTCAGAGAATCGCCAGTACT  |
| <i>MMP10</i> | TCCAGGCTGTATGAAGGAGAGG  | GGTAGGCATGAGCCAAACTGTG  |
