# Supplementary material for: Activator Protein-1 Transcriptional Activity Drives Soluble Micrograft-Mediated Cell Migration and Promotes the Matrix Remodeling Machinery
Source: Hindawi journal article supplement (doi:10.1155/2019/6461580), 2019-12-31
Supplement: f3 [file 6461580.f3.pdf]

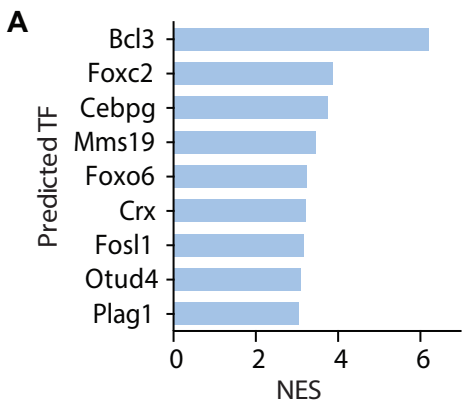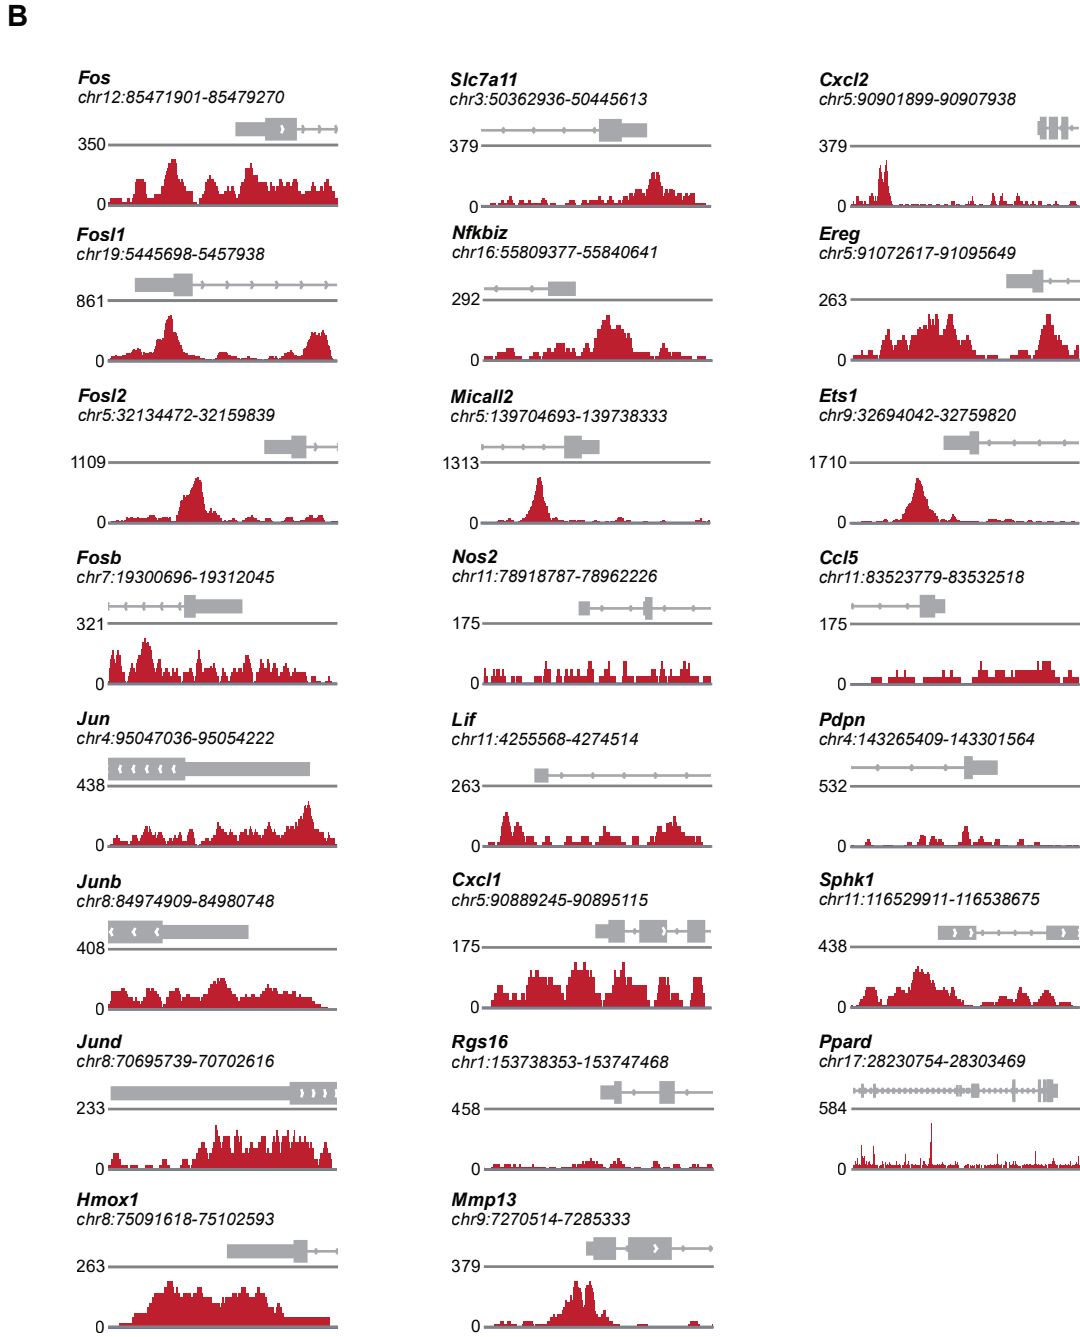

Figure S1 - Balli, Chui et al. 2019
