# Supplementary material for: Activator Protein-1 Transcriptional Activity Drives Soluble Micrograft-Mediated Cell Migration and Promotes the Matrix Remodeling Machinery
Source: Stem Cells Int. 2019 Dec 31;2019:6461580. doi: 10.1155/2019/6461580 (PMC7012246; doi:10.1155/2019/6461580)
Supplement: Supplementary 2 — Table S2: list of differentially expressed genes (unregulated, downregulated, and nondifferentially expressed) upon 5 h of micrograft treatment (as represented in Figure 1). [file 6461580.f2.xlsx]

## Sheet: gene_list
Upregulated	logFC	adj.P.Value		Downregulated	logFC	adj.P.Value		Not significant	logFC	adj.P.Value
Ccl20	9.57517	0.000645679		Klhl13	-1.10418	0.046789		Il1a	9.08622	0.0853271
Cxcl2	9.5582	0.00101888		Lrp6	-1.16842	0.0259647		Krt24	7.20305	0.308492
Gpr84	8.76254	0.020125		Igsf10	-1.21126	0.016089		Mmp1a	6.90949	0.0984269
Nos2	8.70314	1.10831e-06		Thbs1	-1.26021	0.00914161		BC021614	6.62069	0.166037
Gm16685	8.60735	0.00429018		Unc5c	-1.29273	0.0450255		Gbp5	6.4283	0.0586563
Cxcl1	7.76247	7.99524e-05		Hip1	-1.31858	0.0320429		Irg1	6.31805	0.0673837
Ccl5	7.10292	0.0444688		Pik3r3	-1.32563	0.046789		Clec4e	6.01923	0.885401
Lif	6.87026	7.69921e-05		Clspn	-1.34246	0.0480197		Mmp9	5.99334	0.129029
Il6	6.12278	0.00429018		Map4k3	-1.34613	0.0123528		Nepn	5.89968	0.527937
Gpr68	5.69597	0.000268328		Lurap1l	-1.37106	0.046789		Ccl3	5.7972	1
Slc7a11	5.4913	5.85724e-15		Gatad2b	-1.39782	0.0427993		Nlrp3	5.69449	0.696165
Hcar2	5.15632	2.83214e-09		Snai2	-1.39811	0.0109178		RP23-87D8.4	5.41211	0.879992
Cxcl3	5.01903	0.0438127		Cog5	-1.39929	0.0255571		Gm15726	5.41039	0.481565
Tmem132e	4.90616	0.0274867		Crebrf	-1.39964	0.0218302		Ch25h	5.17304	0.064414
Ccl2	4.89933	8.20666e-06		Fam26e	-1.39969	0.0480197		Chst8	5.11162	0.810668
Cxcl5	4.78723	0.00112111		Ankrd44	-1.40648	0.0267144		Areg	5.05736	0.0687931
Cxcl16	4.78698	0.00894262		Bcor	-1.43767	0.0127681		RP23-293I7.4	4.93335	0.836167
Neurl3	4.77632	0.026273		Fzd7	-1.44582	0.00883905		Gpr132	4.92377	0.870362
Gm15242	4.67212	0.00914161		Ston1	-1.46591	0.0406958		Dll1	4.90685	0.100588
Mmp1b	4.6537	0.00265884		Ttc28	-1.5958	0.00738731		Traf1	4.88048	0.845611
Tnfrsf8	4.62884	0.046789		Kif13b	-1.5969	0.0088455		BC023719	4.83436	0.933709
Mmp3	4.44238	0.000321107		Gca	-1.61103	0.0253445		Uox	4.8222	0.804336
Cd40	4.37025	0.00997147		Lfng	-1.61269	0.0441934		Gbx1	4.75247	0.727979
Sele	4.21701	0.00997762		Arhgef28	-1.61582	0.0138653		Gm8520	4.72954	1
Kprp	4.20289	0.000164727		Klhl24	-1.64	0.00173407		Bdkrb1	4.72946	0.176048
Sprr1a	4.03362	0.0442481		Sertad4	-1.65941	0.00265884		Cilp2	4.72429	0.288133
Nfkbia	3.98916	0.0314742		Slitrk6	-1.67724	0.0453214		Cdcp1	4.67514	0.928119
Tfec	3.8952	0.0132178		Ppp1r3c	-1.67954	0.0480197		Tnf	4.66578	0.625294
Icosl	3.75203	0.0402405		Pawr	-1.71111	0.000330646		Gm21975	4.44909	1
Ifi205	3.63877	6.18855e-06		Sorbs1	-1.71562	0.00538517		1700007E05Rik	4.43494	1
Zc3h12a	3.63251	1.18994e-05		Dtl	-1.71611	0.014989		Gm2862	4.38585	1
Arg2	3.58625	0.000543989		Rgl1	-1.73075	0.000635493		Mmp10	4.38551	0.0579962
Dnmt3l	3.57955	0.0155734		Greb1l	-1.75329	0.0185673		Steap4	4.38368	0.0849933
Tgm1	3.4069	0.00894262		Pcdh18	-1.76958	0.0134716		Gm5866	4.35647	1
Slc40a1	3.40174	0.0088455		Mef2c	-1.8099	0.0479001		Tslp	4.28641	0.29358
Slpi	3.34193	8.14737e-06		Ikzf2	-1.85703	0.0105743		Tmem190	4.1943	0.136104
Hmox1	3.30693	2.14957e-16		Masp1	-1.89229	0.00914161		Acpp	4.17609	0.372003
Il11	3.18806	0.000972209		Add3	-1.89759	0.0267144		Hsf5	4.16843	1
Ereg	3.15982	0.000326638		Tlr5	-1.89933	0.0355875		Fam186a	4.12543	1
Has1	3.13774	4.86604e-05		Shroom3	-1.90721	0.0244023		Gm4951	4.1249	1
Adtrp	3.13692	0.0128165		Dlk2	-1.91345	0.046789		Gm4076	4.11606	1
H2-T10	3.09022	0.00563326		Kctd12b	-1.92152	0.0189793		Rnf183	4.11396	0.667226
Nfkbiz	3.0508	1.95569e-09		Adamts5	-1.93213	0.0239507		Gm12276	4.10641	0.597951
Ptx3	3.00849	0.00310767		4632428N05Rik	-1.95515	0.00122789		Olr1	4.07731	1
Cyp7b1	2.91285	0.00981823		Tnrc18	-1.95766	2.67561e-05		Cxcl10	3.99542	0.681662
Plscr1	2.91055	0.03578		Magi3	-1.9599	2.11659e-05		Bmp15	3.96616	1
Gm9687	2.8647	0.0124395		Cep72	-2.00279	0.00168027		Cmtm1	3.96616	1
Ptges	2.81362	0.00883905		Smad6	-2.01724	0.00113035		Elfn2	3.96616	1
Icam1	2.75898	8.24511e-05		Ctnnd2	-2.0318	0.00581889		Rps26-ps1	3.96558	1
Stac	2.68982	0.000625309		Zfp521	-2.03251	7.69921e-05		Tmed6	3.9557	1
Srxn1	2.58451	0.038836		Mrgprf	-2.03781	0.000164727		Ibsp	3.94864	0.167125
Bcl2l15	2.57333	0.0304311		Mecom	-2.03888	0.0115653		Psors1c2	3.89077	0.137051
Gsap	2.54134	0.000356488		Fam46b	-2.03971	2.67561e-05		Gm4524	3.86962	1
Plet1	2.45799	0.00408766		Foxn3	-2.0519	0.00271032		Kcne1l	3.86962	1
Ccl7	2.43598	0.00274696		Il16	-2.05209	0.0264117		Gm14892	3.86522	1
Flt1	2.35028	0.0218302		Tox	-2.08151	0.016089		Slfn8	3.86209	0.979947
Smox	2.3362	0.000706801		Spns2	-2.08445	0.0433676		Hal	3.85649	0.90539
Rgs16	2.3338	6.57604e-07		Id2	-2.1032	8.24511e-05		Gm20658	3.85255	0.845611
Txnrd1	2.31143	0.00304603		Aim1	-2.10931	0.0250584		Ankrd66	3.83436	1
Sema7a	2.30862	9.87131e-05		Lphn2	-2.11042	2.75785e-06		Il13ra2	3.82837	0.0767579
Rbfox1	2.29139	0.000543989		3010026O09Rik	-2.12177	0.0250584		1700010K23Rik	3.81899	1
Micall2	2.27252	1.75334e-08		Slc8a1	-2.1239	0.011422		1700014D04Rik	3.81899	1
Mmp13	2.25402	0.0255571		Mum1l1	-2.18925	7.69921e-05		RP23-226J18.4	3.81899	1
Bcl3	2.24886	0.00274696		Dio3	-2.30064	0.000107142		Gfra2	3.81289	0.137729
Hr	2.24329	0.0207714		Fgfr2	-2.30975	0.0049214		Gm9435	3.80281	1
Dusp10	2.23423	5.63018e-08		Cacna1h	-2.31739	0.000140088		4930500M09Rik	3.79175	1
Gm26682	2.21971	0.00271032		Peli2	-2.31865	0.00883905		Gm28319	3.79175	1
Lrig1	2.2014	0.0438319		Hoxc12	-2.32217	8.83726e-06		Mirlet7i	3.79175	1
Casp4	2.19937	9.49006e-05		Maf	-2.36882	0.000460986		Gm12905	3.77994	1
Oacyl	2.18185	0.0332817		RP24-422C24.2	-2.41315	0.00032058		Pkd1l3	3.76398	1
Bdkrb2	2.10546	0.0138653		Zfp808	-2.50371	0.0202319		Gm7222	3.75194	1
Rhbdf2	2.03168	1.12152e-05		Adra1d	-2.5932	0.0231755		Gper1	3.75174	0.846258
5830432E09Rik	2.02999	0.0472477		Dhrs3	-2.65857	4.12461e-05		BC016579	3.72712	1
Tbx3	1.95899	0.0397178		Cables1	-2.80774	3.09738e-05		1700020L24Rik	3.71852	1
Col5a3	1.9386	3.04428e-06		Atoh8	-2.8707	1.12152e-05		Gm867	3.71364	1
Gfpt2	1.93704	6.32136e-06		Dio3os	-2.89516	2.98632e-08		Rps24-ps3	3.71364	1
Saa3	1.90721	0.046789		Tppp	-2.92787	0.00160299		Slc7a2	3.71233	0.0863281
Map3k8	1.87352	0.0170154		Flrt1	-2.93693	7.69921e-05		G630030J09Rik	3.70186	1
Lcn2	1.86533	0.00173407		Fign	-3.0984	0.00122789		RP24-487F9.1	3.70186	1
Nfkb1	1.85066	0.00848853		Smad9	-3.18798	2.42924e-05		Srms	3.68431	1
Blvrb	1.8104	0.00274696						Gm12414	3.67731	1
Ptgs2os2	1.81001	0.000164727						Scml4	3.64657	0.747985
Slc22a4	1.77727	0.00883905						Ccl22	3.61505	1
Abhd17c	1.76978	5.66079e-05						Gm27019	3.61087	0.442358
Nqo1	1.76534	0.000188001						Upp1	3.60983	1
Slc2a6	1.75885	0.0260618						B020018G12Rik	3.59967	1
Vcam1	1.75486	0.00682153						Slco4a1	3.59855	1
Gsdmd	1.74932	0.000164727						Hgfac	3.55711	1
Esam	1.70013	0.00676237						RP23-280F6.5	3.55711	1
Sqstm1	1.67068	0.046789						Gm16556	3.55596	1
Birc3	1.66913	0.0278388						Gm6537	3.55596	1
Ptgs2	1.61001	0.000526589						Card14	3.55029	1
Psmb8	1.59951	0.0330236						Aqp3	3.54735	0.802928
Adora2b	1.58937	0.0088455						Apob	3.54204	1
Denr	1.5612	0.0112701						Baat	3.54204	1
Ier5	1.55282	0.0113749						Gm11512	3.5232	1
Sphk1	1.54187	0.0088455						Gm26812	3.51682	1
Vegfa	1.53955	0.00122789						Ier3	3.51394	0.105408
Il1rl1	1.52234	0.00115217						Gm4342	3.51329	1
Gareml	1.49823	0.016744						Serpinb2	3.5098	0.318311
Rab20	1.46462	0.0180686						Slc39a4	3.50908	0.408284
Ets1	1.43094	0.00577878						F7	3.50869	0.912654
Sema6d	1.43074	0.0402405						8430408G22Rik	3.49911	1
Stx6	1.42212	0.00795899						Afp	3.49481	1
Ptgs2os	1.42139	0.0332817						Cyp21a1	3.48969	1
Gsr	1.40039	0.0123879						Gm25640	3.48969	1
Nfkbib	1.39977	0.0155676						Gm16150	3.48245	1
Pdpn	1.38946	0.00363827						A4galt	3.47715	0.058149
Dtx4	1.38477	0.017602						Papl	3.46275	1
Fnip2	1.37581	0.0389047						Lpar3	3.46076	0.673223
Fosl1	1.37536	0.00792083						Rpp25	3.44951	1
Rab32	1.34743	0.0355875						9130230L23Rik	3.44665	0.926033
Ubash3b	1.28671	0.0208148						Gm8565	3.42022	1
Zfpm2	1.28431	0.0355875						Lce3a	3.42022	1
Hivep2	1.28172	0.0124395						Kcne4	3.40789	0.933092
Mafg	1.28051	0.0330236						Mx2	3.3971	1
Akr1b8	1.2773	0.0208694						Syt7	3.39602	0.43592
Slc25a25	1.25852	0.0207121						Dgkeos	3.39276	1
Ppard	1.24959	0.0499445						Snord49a	3.39276	1
Stk10	1.24373	0.0355875						1700006J14Rik	3.39056	0.223586
Mina	1.23808	0.0471454						Nod2	3.38909	0.52092
Trib1	1.23276	0.0334399						RP23-59N15.4	3.38298	0.569856
Spsb1	1.15381	0.0250584						4930503B20Rik	3.37883	0.651457
								C230024C17Rik	3.37346	0.429103
								Gm22314	3.35603	1
								Gm15892	3.35571	0.566824
								Gm14137	3.35133	0.850467
								Gad1os	3.34342	1
								Kcna4	3.34092	1
								Rpl38-ps1	3.34092	1
								Gm5977	3.33458	1
								Usp43	3.32344	0.926033
								Ccdc155	3.32296	1
								Gm20442	3.31879	1
								Gm28863	3.31459	1
								Phf11a	3.30283	1
								Clvs1	3.29649	0.545507
								Angptl4	3.28292	0.11228
								Gm13461	3.27302	1
								Igf2os	3.27302	1
								Krt39	3.26491	1
								Epyc	3.26438	1
								Accsl	3.25982	0.844851
								RP23-431L24.1	3.25701	1
								Mup-ps24	3.25602	1
								Gm15247	3.24808	1
								Gm12091	3.24475	1
								Krt17	3.23868	0.231257
								Gm12446	3.23403	1
								Gm26527	3.23403	1
								Gm28437	3.23403	1
								Acox2	3.20969	1
								Gm4211	3.20969	1
								Gm14827	3.20915	0.751294
								Fam83a	3.20484	1
								Mboat4	3.19653	0.925125
								Krt16	3.19412	1
								2410114N07Rik	3.19297	1
								Foxg1	3.19297	1
								Serpina12	3.19297	1
								Gm11149	3.18422	1
								Mmp12	3.18057	0.660155
								Prdm1	3.17245	0.0976792
								Gm13437	3.16838	1
								Gm46	3.15196	1
								Mylk4	3.1507	1
								Apc-ps1	3.1507	1
								Slc7a14	3.1507	1
								3830408C21Rik	3.14958	0.3374
								H2-Q5	3.14892	0.526353
								Gm20702	3.1479	1
								Tnfsf10	3.1479	1
								Mt2	3.14178	0.308492
								RP23-19M20.2	3.1346	1
								Ephx4	3.1249	1
								Smyd1	3.1249	1
								Gm13921	3.10716	1
								Gm26863	3.0997	1
								Gm27956	3.0997	1
								Serpinf2	3.09448	0.319843
								Clec3b	3.09197	1
								Gm15063	3.08639	1
								AA467197	3.08572	0.990855
								Gm13991	3.07296	1
								Gm7429	3.07296	1
								Gm9341	3.07296	1
								Sh2d5	3.06865	0.425474
								RP24-443M8.2	3.06365	1
								AI662270	3.06226	1
								Clec4n	3.06226	1
								Gm10490	3.06226	1
								Gm12271	3.06226	1
								Gm14138	3.06226	1
								RP24-230C18.1	3.06226	1
								Krt36	3.0608	1
								Gm12003	3.05456	1
								Gm13105	3.05093	0.306159
								Rpl31-ps6	3.05003	1
								2410019O14Rik	3.04208	1
								Sp9	3.04083	1
								Tnfaip3	3.04081	0.132594
								Dok7	3.03146	1
								Procr	3.03083	0.0522222
								Gm12335	3.02697	1
								Kcnd3	3.02697	1
								Slc9a2	3.02697	1
								Gm17529	3.0173	1
								Gm7541	3.00797	1
								1700015F17Rik	2.99436	1
								A330032B11Rik	2.99436	1
								Gm29367	2.99317	1
								Atp6v1b1	2.97539	1
								Rpl30-ps5	2.96954	1
								Sp100	2.96001	1
								Csf3	2.9598	0.550768
								4930415F15Rik	2.9557	1
								Dnali1	2.95432	1
								4933440N22Rik	2.95156	1
								Otos	2.95038	1
								Pax8	2.94617	1
								Sh2d2a	2.94617	1
								Gm12668	2.94575	1
								Tmem51	2.94218	0.643014
								Kpna7	2.92865	0.98154
								Clec1a	2.9284	1
								Osgin1	2.92391	1
								9930004E17Rik	2.922	0.998596
								1700125H20Rik	2.9219	1
								Grk1	2.92166	1
								Mafa	2.91723	1
								Bpifc	2.91147	1
								Fam71e2	2.9093	1
								Ccl11	2.90132	1
								Crhbp	2.88947	1
								Gstt4	2.88774	1
								Mcoln2	2.88669	0.566824
								4930570N19Rik	2.87737	1
								Lce1f	2.87574	1
								Plau	2.85211	0.17228
								Gnmt	2.85197	1
								Gm15742	2.84956	1
								Gm6044	2.84956	1
								Klrb1a	2.84956	1
								Pydc4	2.84956	1
								RP23-402K24.1	2.84956	1
								Rpl39l	2.83076	1
								Tmem253	2.82101	1
								Gm23645	2.81899	1
								Gm26775	2.81899	1
								RP23-175B15.2	2.81899	1
								RP23-353O7.3	2.81899	1
								RP24-558H21.1	2.81899	1
								Rnf17	2.81899	1
								Kcnn3	2.80252	0.16288
								Ccl4	2.79923	1
								Gch1	2.7978	0.297786
								Gm10499	2.7918	0.535516
								Rtn4rl2	2.79169	1
								Gm5321	2.79109	1
								Ankrd33b	2.78649	0.795009
								Gm12704	2.78645	1
								Gm8000	2.78645	1
								Slc6a18	2.78645	1
								4930555F03Rik	2.78331	1
								Gm9143	2.77994	1
								Ccl8	2.77274	1
								Il33	2.7722	0.643014
								Gm8818	2.77039	1
								C1qtnf9	2.76398	1
								Cacng1	2.76398	1
								Gm5068	2.76398	1
								Gm7266	2.76398	1
								Snord19	2.76398	1
								Pdgfb	2.74209	0.779973
								Gm8424	2.73989	1
								Rpl31-ps11	2.73412	1
								Fam179a	2.73016	1
								Gm9703	2.72308	1
								Hmga1-rs1	2.72192	1
								Ccl17	2.72186	0.534014
								Gm26767	2.72069	1
								Grhl2	2.71158	1
								Bhmt2	2.70678	1
								Foxh1	2.70678	1
								Gm11583	2.70678	1
								Gm13962	2.70678	1
								Gm5449	2.70678	1
								Gm7030	2.70678	1
								Gm1141	2.7049	1
								Fam84a	2.70481	0.526353
								Mpp4	2.70008	0.913691
								BC007180	2.69522	1
								B930036N10Rik	2.68055	0.846258
								Gm14221	2.67745	0.803074
								RP24-447G12.2	2.66334	1
								Gadd45a	2.65865	0.504578
								Gm15956	2.6482	1
								Gm15148	2.64723	1
								Gm8451	2.64723	1
								Gm11525	2.64723	1
								Gm12990	2.64723	1
								Gm5356	2.64723	1
								Igll1	2.64723	1
								Nlrp5	2.64723	1
								RP23-285H9.2	2.64723	1
								Gm6787	2.64379	1
								Slc25a5-ps	2.6421	1
								Gm12726	2.63727	1
								D730045B01Rik	2.63695	1
								Gm9892	2.63695	1
								RP23-309A11.9	2.63671	1
								Gm25822	2.63331	0.882931
								Pou2f2	2.63075	1
								Gm13710	2.62984	1
								Gm13187	2.62819	1
								Mir7067	2.62314	1
								Gm8824	2.61801	1
								U90926	2.61214	0.846258
								5830454E08Rik	2.61188	1
								B230216N24Rik	2.60876	0.947737
								RP23-274C16.4	2.60801	1
								Carlr	2.60294	0.208038
								Gm6415	2.59997	1
								Prr9	2.59554	1
								Plek2	2.59334	0.930125
								Cntn1	2.59115	0.933092
								F2rl3	2.58728	1
								Tex35	2.57739	1
								Cyp27b1	2.57611	0.215782
								B230317F23Rik	2.57437	1
								Gm17638	2.57437	1
								Gm21971	2.57437	1
								Gm5518	2.57437	1
								Card9	2.57178	1
								Wnt6	2.57092	1
								1700012B09Rik	2.56288	0.493829
								Hpcal4	2.55596	1
								Errfi1	2.5506	0.146365
								Ptcra	2.54967	1
								Klk7	2.54606	1
								Gm20488	2.53187	1
								Zfp385c	2.53187	1
								H2-Q6	2.53021	0.769451
								Nrgn	2.52897	1
								Gm11508	2.52739	1
								Gm5526	2.52659	0.379831
								Egln3	2.52086	0.0945401
								Tnip3	2.51928	1
								Gm14026	2.50896	1
								Sox7	2.50896	1
								Gm7784	2.50896	1
								Pou3f3	2.50896	1
								RP24-384A12.3	2.50896	1
								Rpl9-ps1	2.50896	1
								Rpl9-ps4	2.50896	1
								Zswim5	2.50896	1
								Map7d2	2.50648	1
								Penk	2.5031	0.556837
								Alpk3	2.50104	1
								Hist1h2bm	2.50104	1
								Tal2	2.50009	1
								Gm12447	2.48487	1
								Gm26851	2.48315	1
								Cebpb	2.48176	0.428459
								RP23-61D6.5	2.47759	1
								Gm28512	2.47453	1
								Klk9	2.46781	1
								Nr1i3	2.4656	1
								Ppp1r1b	2.4656	1
								Ngf	2.46463	0.611045
								Stx11	2.46301	0.166037
								Pthlh	2.46054	1
								Milr1	2.46034	1
								Gm11837	2.45642	1
								RP24-443M8.1	2.44743	1
								Bhlhe22	2.44356	0.122227
								Nyx	2.44125	1
								Gm17322	2.43748	0.885916
								Gm12791	2.43452	1
								Mpzl2	2.43371	1
								E130218I03Rik	2.43128	1
								RP23-403H2.3	2.43128	1
								Gm22596	2.42857	1
								Gm28536	2.42857	1
								Gm4852	2.42857	1
								Gm6265	2.42857	1
								Tmprss5	2.42857	1
								RP23-383N15.1	2.42542	1
								Gm16060	2.42275	1
								Hormad2	2.4213	1
								Ces1a	2.41547	0.585953
								2019-03-11	2.41508	0.97438
								Zap70	2.41422	1
								Gm3307	2.41422	1
								Gm12799	2.41043	1
								Nefl	2.40642	1
								9430041J12Rik	2.40291	1
								Tac1	2.39568	1
								Gm26716	2.39329	1
								Tdrd5	2.3932	1
								Appbp2os	2.38775	1
								Rps12-ps5	2.38768	1
								Ddx3y	2.3853	1
								Gm8304	2.3853	1
								4921507P07Rik	2.37804	1
								A330041J22Rik	2.37598	1
								Isg15	2.37547	1
								4930526L06Rik	2.36919	1
								Cabyr	2.36804	1
								Lincpint	2.36285	1
								Dio2	2.35813	0.881987
								Ccr1	2.35782	0.885265
								Rimklb	2.35603	1
								Gm14269	2.35603	1
								Gm16066	2.35603	1
								Gm17709	2.35603	1
								Gm3809	2.35603	1
								RP24-268A16.1	2.35603	1
								Sptbn5	2.35395	1
								4930570G19Rik	2.35131	1
								Gm11469	2.34848	1
								Cd200	2.34829	0.933092
								Tubb4b-ps2	2.33543	1
								Prokr2	2.33203	1
								RP23-474B13.1	2.33194	1
								Gm26773	2.32987	1
								Gm29152	2.32072	1
								Fgf17	2.31907	1
								Ifit1	2.31823	1
								Hcls1	2.31647	1
								Gm11659	2.31551	1
								Ptchd1	2.31533	1
								Urah	2.31049	1
								Gm12583	2.30737	1
								Ddx60	2.3045	1
								Ptgir	2.3044	0.933092
								Rnf19b	2.30293	0.520924
								Gm17150	2.30173	1
								Serpinb1b	2.29724	0.462411
								Cnr2	2.29627	1
								Trpc6	2.29325	0.846258
								Sox30	2.28518	1
								Bach2os	2.28374	1
								Xcr1	2.28329	0.935485
								Tmc7	2.28249	0.844851
								Gm11218	2.27874	1
								Tssk1	2.27637	1
								Slc16a9	2.27502	0.833031
								A230028O05Rik	2.27303	0.622635
								Cldn3	2.27302	1
								Gm6977	2.27302	1
								Gbp3	2.27186	0.637061
								Slc11a1	2.27087	1
								Kcnh1	2.26542	0.554529
								Oas2	2.26462	1
								Pkd1l1	2.26204	1
								Ramp3	2.26039	0.26212
								Gm17276	2.25961	1
								4930431P03Rik	2.25756	1
								Dpyd	2.25604	1
								Gm13199	2.25598	1
								Slc1a2	2.25455	0.488727
								Eqtn	2.24926	1
								Rmrp	2.24895	1
								Tnfsf11	2.24432	1
								Apom	2.24403	1
								RP23-255P20.8	2.24181	1
								Lax1	2.24083	0.845611
								Aldh1a3	2.24044	0.941588
								Ivl	2.23792	0.767187
								Slc23a3	2.2355	1
								Gm13079	2.23403	1
								Ntrk1	2.23403	1
								RP23-101N20.9	2.23403	1
								RP23-201C3.5	2.23403	1
								5830444B04Rik	2.23403	1
								Gfi1	2.23403	1
								Ghrl	2.23403	1
								Gm10566	2.23403	1
								Gm11307	2.23403	1
								Gm11537	2.23403	1
								Gm13620	2.23403	1
								Gm13703	2.23403	1
								Gm25238	2.23403	1
								Opcml	2.23403	1
								Sbk3	2.23403	1
								Snord23	2.23403	1
								mmu-mir-3061	2.23403	1
								Gm6028	2.23292	1
								Tnnt2	2.23176	1
								Plvap	2.22915	1
								Kcnk10	2.22658	0.52092
								Gm14023	2.22434	1
								Gipr	2.22194	1
								Adhfe1	2.22165	0.711482
								Fcrlb	2.22152	1
								4930430E12Rik	2.21931	1
								Gm26730	2.2167	1
								Shbg	2.21663	1
								Gm27326	2.21556	1
								Xpnpep2	2.21503	1
								RP23-470G18.2	2.21442	1
								Fndc7	2.2111	0.296637
								Spata4	2.21019	1
								2010003K11Rik	2.20994	1
								Cyp11a1	2.20994	1
								Gm10134	2.20994	1
								Tmem91	2.20907	1
								Itga2	2.20812	0.839605
								Ecel1	2.20317	1
								Dusp5	2.20315	0.0706119
								Relb	2.20141	0.130345
								Rhbdl1	2.20135	1
								Gm5380	2.19297	1
								Gm25500	2.19177	1
								8030451A03Rik	2.1891	0.43592
								Iqcf4	2.1856	1
								Bnipl	2.18494	1
								Cdh1	2.18494	1
								Gm5909	2.18494	1
								Gm7628	2.18494	1
								Gm9920	2.18494	1
								Hist1h3c	2.18494	1
								Mir6963	2.18494	1
								Npw	2.18494	1
								Piwil4	2.18494	1
								Wisp3	2.18494	1
								Pde4c	2.18421	1
								Kcnrg	2.17785	1
								Asprv1	2.17501	1
								Hist1h4a	2.17419	1
								Gm26764	2.17334	1
								H2-Q4	2.17182	0.0563983
								Miox	2.16888	1
								Strc	2.16888	1
								Gm13334	2.16843	1
								Dgkk	2.16792	1
								Gm5607	2.16714	1
								Gm10116	2.16545	1
								Gm5292	2.16459	1
								Ccl9	2.16156	0.249079
								Gm22753	2.16085	1
								Gm15950	2.16025	1
								Il1r2	2.15987	1
								Gm10260	2.15879	1
								mt-Co2	2.15584	1
								Kcnj14	2.15461	0.965059
								1700101I11Rik	2.15248	1
								Pomc	2.15112	0.57089
								Cyp2ab1	2.1507	1
								BC048507	2.1507	1
								Cytip	2.1507	1
								Gm13840	2.1507	1
								Gm14156	2.1507	1
								Gm14251	2.1507	1
								Gm24907	2.1507	1
								Lrfn5	2.1507	1
								RP23-424K5.2	2.1507	1
								Siglec15	2.1507	1
								Snord49b	2.1507	1
								Gm9431	2.15029	1
								Cma2	2.14914	0.993443
								Ifitm5	2.14834	1
								1700007J10Rik	2.14526	0.9467
								Gm9568	2.14477	1
								Gm6913	2.14434	1
								Cx3cl1	2.14353	0.810668
								Egr4	2.14193	1
								Gm16185	2.14109	1
								Cited1	2.13322	1
								Anxa13	2.12952	0.837812
								RP23-363M8.2	2.12661	1
								Mir7036	2.12661	1
								Pp2d1	2.12661	1
								Gm11839	2.12627	1
								Nlgn3	2.12566	1
								Gm11706	2.1255	1
								Timd2	2.12182	1
								Serpinc1	2.11855	1
								Gm11224	2.11598	1
								Apol8	2.11267	0.857553
								Gm4853	2.11236	1
								Lce1g	2.11194	0.497235
								Gm11942	2.10916	1
								Hoxd10	2.10716	1
								Igsf6	2.10716	1
								1700034P13Rik	2.10134	0.603908
								Kcnab3os	2.0997	1
								RP23-20F10.1	2.0997	1
								Gm5106	2.099	1
								Tdrd9	2.0966	1
								RP24-321N12.1	2.09327	1
								Npm2	2.09111	1
								Lce1h	2.08978	0.22768
								Gm7293	2.0876	1
								Acsbg1	2.0871	0.520924
								Cuzd1	2.08639	1
								Il19	2.08532	1
								Insl5	2.08532	1
								I830012O16Rik	2.08347	1
								Trim10	2.08307	1
								Gm11353	2.0811	1
								Zbp1	2.08069	1
								Havcr1	2.07982	0.87655
								Mtmr7	2.07877	0.980089
								RP24-89F9.4	2.07745	0.901922
								2610316D01Rik	2.07625	1
								Ccdc154	2.07561	1
								Pnliprp2	2.07561	1
								Rnf151	2.07122	1
								Socs3	2.06396	0.710361
								Gm9939	2.06226	1
								Pglyrp1	2.06226	1
								Ppp1r16b	2.06226	1
								Akr1cl	2.06226	1
								Ebi3	2.06226	1
								Far2	2.06226	1
								Fcgr1	2.06226	1
								Gimap8	2.06226	1
								Gm12280	2.06226	1
								Gm14487	2.06226	1
								Gm15766	2.06226	1
								Gm17036	2.06226	1
								Gm17634	2.06226	1
								Gm26649	2.06226	1
								Gm7656	2.06226	1
								Gm9008	2.06226	1
								Gm9697	2.06226	1
								Marco	2.06226	1
								Pira2	2.06226	1
								RP23-173H19.3	2.06226	1
								RP23-302C16.5	2.06226	1
								Mt1	2.06061	0.821865
								Plekhs1	2.05731	0.523098
								E030037K01Rik	2.05456	1
								Gm4795	2.05424	1
								Gm5803	2.05287	1
								Gm5147	2.0517	1
								1700057G04Rik	2.04913	1
								1700030C14Rik	2.04887	1
								Rab25	2.04887	1
								Prkcb	2.04852	1
								Rps15a-ps6	2.04795	1
								Gm1045	2.04727	1
								Bmp3	2.04616	1
								Kera	2.04616	1
								4930440I19Rik	2.03818	1
								RP24-337A16.2	2.03524	1
								Camp	2.03508	1
								Gm12009	2.03093	1
								Nppc	2.02909	0.333335
								Zdhhc23	2.02701	1
								Gm8814	2.0263	1
								Gm29155	2.02584	1
								Ankk1	2.02488	0.197843
								Gm26601	2.02429	1
								Glyat	2.02408	1
								Gm15445	2.02159	1
								Glrx	2.02121	0.171911
								1810011O10Rik	2.02105	0.166037
								Gm11899	2.02001	1
								Gm7497	2.02001	1
								Scin	2.01939	1
								Lrrc8d	2.0176	0.295695
								Usp18	2.01649	1
								1700016P03Rik	2.01399	0.802928
								Ccnb2-ps	2.01385	1
								Atp2c2	2.01265	1
								4930444P10Rik	2.00797	1
								Clcnkb	2.00748	1
								Soat2	2.0056	0.810668
								RP24-363G13.1	2.00549	1
								Tnfrsf9	2.00459	0.984726
								Slc15a3	2.00166	0.98154
								Gm8724	2.00144	1
								Pnpla1	2.00118	1
								Vsig2	1.99973	0.0628019
								Gm7860	1.99823	0.95835
								Rps18-ps1	1.99729	1
								Meiob	1.98945	1
								Stmn4	1.98904	1
								Ccdc184	1.98574	1
								Ovol1	1.98388	1
								Schip1	1.98281	1
								Gm11605	1.98133	1
								Gm12207	1.97676	1
								Serinc4	1.97674	1
								Cebpd	1.97322	0.85267
								Gm14132	1.97022	1
								Gm15470	1.96795	1
								Homer2	1.96671	1
								Gclm	1.96511	0.0506068
								Gm7609	1.96309	1
								Gm6030	1.96136	1
								Gm16230	1.95995	1
								A130023I24Rik	1.95983	1
								Cfi	1.95461	1
								Il1f9	1.95409	0.983155
								Prl2c3	1.95208	0.989763
								A330040F15Rik	1.95156	1
								BC006965	1.95156	1
								Btnl10	1.95156	1
								Gm13236	1.95156	1
								Gm15406	1.95156	1
								Gm7289	1.95156	1
								Gm9990	1.95156	1
								Rbp2	1.95156	1
								Scg3	1.95156	1
								Spata9	1.94823	1
								Cyp1a1	1.94665	1
								Rnd1	1.94659	0.960668
								Ccdc36	1.94617	1
								AB124611	1.94487	1
								Dnah10	1.94159	0.309423
								RP23-147I4.1	1.93865	1
								Ugt3a1	1.93811	1
								Tldc2	1.93761	1
								Gbp2	1.93657	0.0736442
								Moap1	1.93574	1
								Clstn3	1.93545	1
								Slc27a5	1.93545	1
								Gm26902	1.93302	0.810668
								Gbp6	1.93163	1
								1700030M09Rik	1.92949	1
								Gm5210	1.92747	1
								Gm6580	1.92747	1
								RP23-470G12.2	1.92747	1
								Iqsec3	1.9225	1
								RP24-388D8.7	1.92214	1
								Slc16a12	1.9219	1
								Tmem171	1.92044	1
								Sdcbp2	1.91918	1
								Cd14	1.91917	0.103381
								Bik	1.91654	1
								Cd53	1.91252	1
								9330175E14Rik	1.91009	1
								Rplp1-ps1	1.90789	1
								Gdnf	1.90583	0.689003
								Gm15599	1.90225	1
								Rapgef3os2	1.90146	1
								Csf2rb	1.90116	1
								Gm14857	1.89781	1
								Gm16010	1.89781	1
								Rpl27a-ps1	1.89781	1
								Efcab8	1.89428	1
								1700007K09Rik	1.89283	1
								WI1-1981I9.2	1.89093	1
								Pcsk1n	1.88862	1
								Slc23a1	1.88862	1
								Rgs9	1.88629	1
								Rps15a-ps4	1.88467	1
								Slc22a13	1.88436	1
								Gm15853	1.87597	1
								Gm12139	1.87449	1
								Gm13464	1.87336	1
								Stkld1	1.87024	1
								Gm8648	1.87011	1
								Dhx30	1.87008	1
								Gm9888	1.86984	1
								Gm27512	1.86984	1
								Prr19	1.86984	1
								2310014L17Rik	1.86937	0.443454
								Itgb3	1.86814	0.435238
								Rgs8	1.86807	1
								Gm15708	1.86701	1
								Axdnd1	1.86674	0.67522
								Nppb	1.86641	0.534014
								Gm8444	1.86563	1
								Gm12092	1.86455	1
								Gm17455	1.86256	1
								4933408B17Rik	1.86157	0.407045
								1700109H08Rik	1.8604	1
								Gm15593	1.8592	1
								Kremen2	1.85629	1
								Cmpk2	1.85587	1
								Igtp	1.85431	1
								Hemt1	1.85242	1
								Masp2	1.85165	1
								Ikbke	1.85098	0.211507
								Gm26708	1.84956	1
								Lgals2	1.84956	1
								Gm12463	1.84956	1
								Gm15798	1.84956	1
								Gm22906	1.84956	1
								Gm26686	1.84956	1
								Gm28096	1.84956	1
								Gm28535	1.84956	1
								Gm8302	1.84956	1
								RP23-44N5.3	1.84956	1
								Rps19-ps10	1.84897	1
								5830462I19Rik	1.84727	1
								Gm11535	1.84553	1
								4933407L21Rik	1.8455	1
								Gm10923	1.8455	1
								Gm13252	1.8451	1
								Grb7	1.84283	1
								Gm16045	1.8428	1
								Gm16098	1.84201	0.290323
								Trim72	1.84201	1
								Atp8b3	1.83612	1
								Gm8885	1.83526	1
								Gm10247	1.83345	1
								Oasl2	1.82997	0.631726
								Gm29123	1.82878	1
								Dnah17	1.82829	1
								Gm15462	1.82749	1
								Matk	1.82573	1
								Mrc1	1.82386	1
								Erdr1	1.82341	0.902882
								Gm12057	1.82075	1
								Gm7204	1.82	0.367136
								9130409J20Rik	1.81899	1
								F730035M05Rik	1.81899	1
								Meig1	1.81899	1
								Aldh3a1	1.8181	1
								Il18r1	1.81764	1
								Trim71	1.81727	1
								Adam21	1.81507	1
								5430402O13Rik	1.8146	1
								Gm8254	1.81447	1
								Cldn18	1.81315	1
								Kcnk1	1.81092	1
								Amh	1.81053	1
								G530011O06Rik	1.80873	0.796539
								Cspg5	1.80814	1
								Rsad2	1.80691	1
								Gm25492	1.80626	1
								1700095J07Rik	1.80625	1
								Gm10136	1.80625	1
								Fam167a	1.80617	1
								Gm11611	1.80426	1
								Gjb2	1.80371	0.625279
								Ttc39c	1.80007	0.159003
								Tlr2	1.79964	1
								I830127L07Rik	1.79928	1
								Sfn	1.79698	1
								Ccdc152	1.7949	1
								4732463B04Rik	1.7949	1
								Gm14461	1.7949	1
								Gm15713	1.7949	1
								Gm26860	1.7949	1
								Ppef2	1.7949	1
								A230077H06Rik	1.79431	1
								Hunk	1.79417	1
								Ankrd61	1.79307	1
								Tymp	1.79022	1
								Prss16	1.78741	1
								1700056E22Rik	1.7866	0.458613
								Shd	1.78577	1
								Cnfn	1.78523	1
								Prss22	1.78102	0.0902892
								Gzmk	1.77872	1
								Gm1123	1.7785	1
								RP23-349L18.2	1.77697	1
								Dtnbos	1.77359	1
								Frmd4b	1.77306	0.218599
								Gpr110	1.77007	1
								Aim1l	1.76953	1
								Ripply3	1.76885	1
								Hrh1	1.76812	1
								Gm10282	1.76398	1
								Gm13594	1.76398	1
								Gng13	1.76398	1
								Hoxd13	1.76398	1
								RP23-18M1.6	1.76398	1
								Pla2g3	1.76283	1
								Hvcn1	1.75992	0.302174
								B430219N15Rik	1.75888	1
								Aif1	1.75853	1
								Gm609	1.75729	1
								Gm15851	1.75524	1
								Ndrg1	1.75342	1
								Serpina3i	1.75144	1
								Apold1	1.75076	1
								Phlda1	1.75065	0.0532952
								Slc25a34	1.74962	1
								Gm16907	1.74947	1
								Gm21992	1.749	0.101709
								B830012L14Rik	1.74297	1
								Gm6286	1.74284	1
								Fjx1	1.74001	0.651457
								1810049J17Rik	1.73989	1
								Gm26535	1.73989	1
								Gm6264	1.73989	1
								1190005I06Rik	1.73841	1
								Elovl3	1.73776	1
								Gabrr2	1.73551	1
								Gm12097	1.73351	1
								Gm14302	1.73351	1
								Hc	1.73351	1
								Ppm1j	1.73254	1
								Cd274	1.73033	0.181578
								Grin3b	1.72861	1
								Gm9812	1.72762	1
								CAAA01187608.3	1.72575	1
								Ssmem1	1.72285	1
								Gdap1l1	1.72238	1
								Krt84	1.72221	1
								Gm8692	1.72208	1
								Prdx1	1.71957	0.526353
								Gm3331	1.71788	1
								Clrn1	1.71787	1
								Gm4535	1.71787	1
								Sla	1.71742	1
								Gnrh1	1.71633	0.949422
								Gng10	1.71576	1
								Gm4953	1.71345	1
								6330403N20Rik	1.71333	1
								Rps24-ps2	1.71312	1
								Gnb3	1.71265	1
								Mcmdc2	1.71201	1
								Trpc2	1.71167	1
								1700093J21Rik	1.71136	1
								Naip5	1.70738	1
								Sema4b	1.70712	1
								Gm17826	1.70678	1
								Prss32	1.70678	1
								Rbm44	1.70642	1
								Gm8731	1.70607	1
								Tmem204	1.70054	1
								Psd2	1.69943	1
								2310007B03Rik	1.69936	1
								Morn5	1.69808	1
								6430531B16Rik	1.69671	1
								Cdh5	1.69571	1
								Gm16334	1.69022	1
								Gm16279	1.69007	1
								Zfp541	1.68977	1
								Actn2	1.68955	1
								Yjefn3	1.68654	0.675571
								Il2rg	1.68627	0.955366
								Gm10300	1.68605	1
								Gldc	1.68523	1
								6230400D17Rik	1.68522	0.622515
								Pate2	1.68312	1
								Eno1b	1.68299	1
								Gm28652	1.68269	1
								Tmc3	1.68269	1
								Cerkl	1.68219	1
								Snora7a	1.67886	1
								Cd300lg	1.67719	1
								Afap1l2	1.67519	0.999323
								Akr1c18	1.67449	0.599372
								1700123L14Rik	1.67243	1
								Prdx2-rs3	1.67221	1
								Gm11185	1.67205	1
								Snora31	1.67105	1
								9530056K15Rik	1.66967	0.629316
								Bnc1	1.66962	1
								RP23-101P2.5	1.66567	1
								Pcsk1	1.66398	1
								Enpp2	1.6637	1
								Gm17606	1.66109	1
								Gm16793	1.65948	0.933092
								Gm9493	1.65934	1
								Gm5093	1.65902	1
								Gpr162	1.65479	0.947412
								Arl9	1.65424	1
								Gm7862	1.65202	1
								A3galt2	1.6509	1
								Gm13935	1.65077	1
								Crym	1.64904	1
								Fut7	1.64784	1
								1010001N08Rik	1.64723	1
								Gm14048	1.64723	1
								Gm25604	1.64723	1
								Gm4487	1.64723	1
								Gm7224	1.64723	1
								Rps11-ps2	1.64723	1
								Prl8a1	1.64641	1
								Gm15807	1.64423	1
								Ccdc24	1.64322	0.793253
								Rps15a-ps5	1.64227	1
								A430078G23Rik	1.64165	1
								Ngb	1.6405	1
								Rasgrf1	1.6399	1
								Snord104	1.63977	1
								Exph5	1.63881	1
								Gm14734	1.63695	1
								Gm15722	1.63695	1
								Gm26801	1.63695	1
								RP24-280G4.6	1.63695	1
								Smim17	1.63695	1
								2310034G01Rik	1.63682	1
								Nfkbid	1.6368	0.423264
								Gm10912	1.6352	1
								Gm6506	1.63356	1
								AI606181	1.6326	0.0814339
								Tmem238	1.63094	0.902882
								Fnd3c2	1.6279	1
								Eif1-ps1	1.62314	1
								Gm16223	1.62314	1
								Nrtn	1.62314	1
								Gm7611	1.61991	1
								Gm10654	1.61718	1
								Gm28913	1.61554	1
								Tub	1.61554	1
								Mex3b	1.61532	0.843717
								Gm5611	1.61513	1
								RP23-73N8.3	1.61286	1
								Rpl14-ps1	1.61286	1
								Tnfrsf4	1.60933	1
								Ncf4	1.60906	1
								Gm15212	1.60863	1
								Gm15506	1.60625	1
								Snord65	1.60469	1
								Nlrp12	1.60394	1
								3830417A13Rik	1.6026	1
								Pllp	1.6026	1
								Gm12630	1.60214	1
								Gm13337	1.60206	1
								Ccdc62	1.60033	1
								Gm7867	1.59997	1
								A830008E24Rik	1.59997	1
								Clic6	1.59997	1
								E130006D01Rik	1.59997	1
								Gm12642	1.59997	1
								Gm13511	1.59997	1
								Gm26536	1.59997	1
								Gm26588	1.59997	1
								Gm28285	1.59997	1
								Gm3940	1.59997	1
								Gm5402	1.59997	1
								Gm5510	1.59997	1
								Gm8173	1.59997	1
								RP23-323E20.2	1.59997	1
								RP23-68D4.1	1.59997	1
								RP24-429M15.2	1.59997	1
								S100a8	1.59989	0.966317
								Tecta	1.59933	1
								RP24-116C1.8	1.59912	1
								RP24-288J3.2	1.59844	1
								Klf1	1.59511	1
								Mroh7	1.5919	1
								Clec4d	1.59096	1
								Gm12089	1.5909	1
								Gm5468	1.58761	1
								1700092M07Rik	1.58746	1
								Snord72	1.58737	1
								Gm9234	1.58717	1
								Sod2	1.58605	0.052516
								Evpl	1.58242	1
								5830416P10Rik	1.58113	0.651457
								Gm14693	1.58109	1
								Fbxo43	1.58061	1
								Qrfp	1.58036	1
								Adam8	1.58032	1
								Armc2	1.57768	1
								Gm12435	1.57588	1
								Gm17205	1.57588	1
								Msx3	1.57588	1
								Tmem196	1.57588	1
								Gm13750	1.57514	1
								Papln	1.57437	1
								Syt5	1.57262	0.37659
								Gm7290	1.57221	1
								Gm11331	1.57216	1
								Gm14636	1.57053	0.775165
								Nnat	1.56869	1
								Misp	1.56869	1
								Gm19840	1.56574	1
								Gm5453	1.56553	1
								Prl2c2	1.5654	1
								Gm17224	1.56468	1
								Gm3411	1.56321	1
								Colec10	1.56254	1
								Gm5133	1.56228	1
								Gm11531	1.56186	1
								Rpsa-ps9	1.56078	0.925125
								Trav14-2	1.56064	1
								Gm15869	1.55995	1
								Rgs2	1.55944	0.646761
								Spock1	1.55771	1
								Gm10369	1.55771	1
								Gm11032	1.55771	1
								Gm20748	1.55721	0.444901
								Trbc2	1.55643	1
								Bglap3	1.55596	1
								Gm15676	1.55509	1
								Snord87	1.5539	1
								Ager	1.5534	0.526353
								Pik3r5	1.55236	1
								Gm14263	1.55029	1
								Gm14681	1.55029	1
								Serpind1	1.54995	1
								RP23-71J17.5	1.54925	1
								Gm16238	1.54909	1
								Nfkb2	1.54852	0.0781641
								Npas1	1.54431	1
								Il34	1.54255	1
								Rpl18a-ps1	1.54219	1
								Gm7456	1.54204	1
								Il21r	1.54204	1
								Fam43b	1.53975	1
								Car4	1.53707	1
								Gm15677	1.53466	1
								Rab11fip1	1.53403	1
								Zglp1	1.53209	1
								Fermt3	1.52923	1
								Oit3	1.52605	1
								Col20a1	1.52598	0.795634
								1110017D15Rik	1.52579	1
								Kctd4	1.52556	1
								Vmn1r-ps151	1.52496	1
								Cfap70	1.5233	1
								Wnt11	1.52254	0.296391
								Pabpc1l	1.52155	0.539225
								Pla2g5	1.51979	1
								Fam71f2	1.51953	0.999323
								Gm10029	1.51794	1
								Itgb1bp2	1.5173	1
								Cdh15	1.5171	1
								Gm2670	1.51552	1
								Cd93	1.51526	1
								Gm24119	1.5137	1
								4833427F10Rik	1.51295	1
								Guca1b	1.51235	0.22768
								Fam83e	1.51158	1
								AU020206	1.50967	0.223612
								Arhgap22	1.50958	1
								Bmx	1.50896	1
								Gm11599	1.50896	1
								Gm5316	1.50896	1
								Gm5678	1.50896	1
								Gm6023	1.50896	1
								P2rx2	1.50896	1
								Rltpr	1.50879	0.437788
								Wdr38	1.50673	1
								Gm3248	1.50667	1
								Gm6863	1.50612	1
								Gm13666	1.50609	1
								Gm6451	1.50609	1
								Slc16a8	1.50609	1
								Podxl	1.50542	1
								Gm10532	1.50516	1
								Gm16253	1.50332	1
								Chrna1	1.50068	1
								Tcp11	1.50001	1
								Fbxl13	1.49973	0.773394
								Olfr212	1.49965	1
								2300005B03Rik	1.49911	1
								Stoml3	1.49911	1
								Gm12267	1.49863	1
								Syt1	1.49863	1
								Ces2b	1.49808	1
								Ifi203	1.49724	0.179676
								Gm20528	1.49691	1
								Mfhas1	1.49622	0.12191
								Abcc4	1.49544	0.577931
								Gm13260	1.49394	1
								Shisa6	1.49158	1
								Gja4	1.49079	1
								Hoxaas3	1.49045	1
								Gm29340	1.48991	0.772399
								RP24-400M20.3	1.48969	1
								Fam209	1.48636	1
								RP23-335C3.8	1.48548	1
								Gm17230	1.48487	1
								Gm4707	1.48487	1
								Gucy2c	1.48304	1
								Epgn	1.4793	0.804336
								Vps37b	1.47843	0.488799
								A2m	1.4773	1
								Gm16268	1.4773	1
								Gm5741	1.4773	1
								Fam110c	1.47704	0.148539
								Ermap	1.47563	1
								Gm10941	1.47484	1
								Gm5345	1.47365	0.83592
								AF366264	1.4726	1
								Exoc3l4	1.46739	0.258315
								RP23-414N3.1	1.4656	1
								Elavl4	1.46517	1
								Fscn2	1.46517	1
								Mroh2a	1.46282	1
								Gm15131	1.46272	1
								Xkrx	1.46158	1
								Col23a1	1.46137	0.949458
								Fxyd2	1.4594	0.846258
								Gdf5	1.45907	1
								A230059L01Rik	1.45882	1
								Gm5248	1.45865	1
								P2ry10	1.45865	1
								2310069B03Rik	1.45661	1
								9130020K20Rik	1.45594	1
								Prr15	1.45537	1
								1700017D01Rik	1.45481	1
								Gm17214	1.45481	1
								Gm22516	1.45481	1
								Gm5054	1.45481	1
								A230072E10Rik	1.45474	1
								Gm5566	1.4535	1
								Mir17hg	1.45097	0.0673837
								Gm16103	1.44854	1
								Vegfc	1.44832	0.896283
								Rgs7	1.44723	1
								Ihh	1.44671	1
								Ascl2	1.44502	1
								Bst2	1.44394	0.456921
								Amn	1.44392	1
								Gm26818	1.44345	1
								F830208F22Rik	1.44302	1
								Stra6	1.44201	1
								Gm16796	1.44158	1
								Npff	1.44101	1
								Spry4	1.44071	0.867729
								Alpk2	1.44008	1
								Atp2b3	1.43748	1
								Gm11841	1.43742	1
								Amigo3	1.43687	0.0588162
								F2rl1	1.43645	0.137051
								Bid	1.43589	0.305951
								Pitpnm3	1.43586	1
								Tnfaip2	1.43402	0.0706119
								AU018091	1.42994	1
								Mrgprc2-ps	1.42857	1
								Ptpn5	1.42857	1
								RP24-400M20.2	1.42716	1
								Tbx3os1	1.42604	1
								Frmd5	1.42394	1
								Cx3cr1	1.42329	1
								Abca12	1.42275	1
								Gm11425	1.42226	1
								Gm17615	1.42226	1
								Rpl5-ps1	1.42226	1
								Sla2	1.42226	1
								Gm13524	1.41935	1
								Pced1b	1.41787	1
								Kcnu1	1.41722	1
								Otop1	1.41664	1
								Nfkbie	1.41603	0.0524148
								Bmp6	1.41536	0.0819996
								Fbxw10	1.41271	0.191137
								Gm16344	1.41225	1
								Msantd1	1.41101	0.782784
								Prss56	1.40921	1
								Gm8870	1.40889	1
								Col6a6	1.40733	1
								Gm5915	1.40657	1
								Mmp24	1.40571	1
								Gm15614	1.4055	1
								Gm6944	1.40536	1
								Gm16325	1.40448	1
								RP23-309A8.4	1.40448	1
								Gm26569	1.40418	1
								Gm14122	1.40243	1
								Gm7638	1.40186	1
								RP24-541A5.1	1.39984	1
								Gm16073	1.39979	1
								Plk2	1.39958	0.425474
								Lipc	1.39664	1
								Ell2	1.39502	0.11228
								Vpreb1	1.39303	1
								Aicda	1.39198	1
								Gm14046	1.39192	0.879992
								Gm6065	1.39171	1
								RP24-88B13.7	1.39128	1
								Gm12603	1.3907	1
								Cyp2e1	1.39016	1
								Sntb1	1.38721	1
								Atp1a3	1.3864	1
								Gm4294	1.38514	1
								Gm15860	1.38298	1
								Lrrc46	1.38225	1
								Cdh22	1.38168	0.854386
								Gm6756	1.38082	1
								Doc2g	1.37975	0.132594
								C920025E04Rik	1.37921	0.643014
								RP24-317P24.1	1.37863	1
								Rhof	1.3776	1
								Krt18	1.37736	1
								Mss51	1.37545	0.965059
								2310010J17Rik	1.37325	1
								Bloc1s6os	1.3724	1
								Ccdc110	1.3721	1
								Cbr3	1.37117	0.150531
								Asic3	1.37095	1
								Stk17b	1.36984	0.773394
								H2-Q7	1.36876	1
								Cst6	1.36662	1
								Ifit3	1.36634	1
								Gabrg3	1.36597	1
								Rpl31-ps15	1.36597	1
								Cystm1	1.36568	1
								RP23-300L15.1	1.36448	1
								Nr4a3	1.36428	0.288133
								Gm19589	1.36358	1
								Gm13589	1.36163	1
								Gm5451	1.36163	1
								Gm14165	1.36121	1
								Tmprss9	1.35978	1
								Ezr	1.35867	1
								A730013G03Rik	1.35603	1
								Dll4	1.35603	1
								Shisa2	1.3548	1
								Kcnc2	1.35434	1
								Dcdc2a	1.35182	1
								Gm26604	1.35182	1
								Dnah8	1.35049	1
								Flt3	1.35049	1
								RP23-61D6.3	1.35049	1
								Stat4	1.35049	1
								RP23-27L18.4	1.34985	1
								Acer2	1.34961	0.968739
								Gm28424	1.34873	0.977894
								Abcg1	1.34839	1
								Gm15287	1.3476	1
								Gm14435	1.34682	1
								Ttyh1	1.346	1
								Gm17102	1.3444	1
								Kirrel3os	1.34393	1
								Stmn3	1.34297	1
								Syt4	1.33838	0.800353
								Wfikkn1	1.33802	1
								Tex38	1.3379	1
								Gm14565	1.33749	1
								P2ry2	1.33664	1
								Gm1818	1.33595	1
								Gm14286	1.33585	1
								Gp49a	1.33553	1
								C130074G19Rik	1.33543	1
								Gm4945	1.33406	1
								RP23-433B11.1	1.33377	1
								Gm11738	1.33194	1
								Gm15416	1.33194	1
								Nr5a2	1.33194	1
								Qrich2	1.33194	1
								Sctr	1.33194	1
								Tyr	1.33194	1
								Skint8	1.33109	1
								B430203G13Rik	1.33086	1
								Gm22637	1.33035	1
								Gm6517	1.3299	1
								Prodh	1.3295	1
								Gm12164	1.32925	0.540753
								Gm10073	1.32915	0.954785
								Cyth4	1.32883	1
								Gm3671	1.32861	1
								Mettl7a3	1.32669	1
								Kdm4d	1.32592	1
								Gm12177	1.32568	1
								Snhg9	1.32541	1
								Mslnl	1.31992	1
								Bmp2	1.31864	1
								Hilpda	1.31783	0.0582989
								Clcn1	1.31762	1
								Asphd1	1.3165	1
								9330161L09Rik	1.31533	1
								Plk3	1.31015	0.126281
								Zfp575	1.3097	1
								RP23-274G21.3	1.30853	1
								Mir433	1.30725	1
								Fcgr2b	1.30637	1
								Gm11407	1.30618	1
								Gm11560	1.30558	1
								Gm5914	1.30543	1
								Nags	1.3045	1
								AC118721.1	1.30393	1
								Gtsf1	1.30375	1
								Dok2	1.30296	1
								Gm2000	1.30187	1
								Tpt1-ps6	1.30088	1
								Gm5860	1.29918	1
								Dram1	1.29824	1
								Dlgap1	1.29622	1
								Lat	1.29522	1
								Tmem25	1.29345	1
								Rffl	1.29335	0.0625461
								Gm7658	1.29315	1
								Smpd5	1.29098	1
								Ncmap	1.29006	1
								Ly6g	1.28981	1
								Cyp2c55	1.28977	1
								5430427O19Rik	1.2878	1
								Gm5896	1.2878	1
								B230312C02Rik	1.28618	1
								Scand1	1.28518	1
								Gm27012	1.28333	1
								Wnt7b	1.28318	1
								4931440J10Rik	1.28304	1
								RP24-505E24.2	1.28304	1
								Rpl17-ps9	1.28304	1
								Hcn3	1.28244	1
								Hecw1	1.28013	1
								Gsta4	1.27888	1
								Fth1	1.2762	0.105408
								Nefm	1.27596	1
								Gm20518	1.27577	1
								Lce1l	1.27534	1
								Gal	1.27394	1
								Gm9083	1.27382	1
								Gm12967	1.2728	1
								Gm15464	1.27276	1
								RP24-549O22.1	1.27276	1
								Gm19557	1.27235	1
								Clec5a	1.27061	1
								Chchd10	1.26997	1
								Mir127	1.2695	1
								Gm11127	1.26861	1
								Irs3	1.26843	1
								Gje1	1.26794	1
								Gm10025	1.26696	1
								Cpa4	1.26692	1
								Col27a1	1.26591	0.0670493
								Smim3	1.26581	0.955366
								Clec2e	1.26551	1
								Gm15487	1.2653	1
								Gm14290	1.26515	1
								Gm13685	1.26459	1
								4930520O04Rik	1.2645	1
								RP23-415E17.1	1.26425	1
								Slc47a1	1.26416	1
								RP23-418C16.1	1.26255	1
								Timp1	1.26226	0.646761
								Paqr6	1.26203	1
								A330009N23Rik	1.2606	0.711557
								Gm28370	1.25963	1
								Kif17	1.25938	1
								Snord42a	1.25919	1
								Trem1	1.25873	1
								Alas1	1.25837	0.488806
								Eaf2	1.2583	0.59185
								Trib3	1.25817	1
								Aloxe3	1.25371	1
								Tm4sf4	1.25342	1
								Socs1	1.25312	0.602158
								Wfdc2	1.25266	1
								Gm11970	1.25206	1
								Gm17382	1.2517	1
								Gm12017	1.24938	1
								Xaf1	1.24873	0.659624
								Elovl7	1.24866	1
								Gm4258	1.24849	1
								Pdxk-ps	1.24849	1
								Rpl29-ps5	1.24849	1
								Tnip1	1.24682	0.174356
								Klhl38	1.24492	1
								Kcnj12	1.24414	1
								Tm6sf2	1.24354	1
								Jakmip3	1.24022	1
								Arl11	1.23951	1
								RP24-82E11.1	1.23915	1
								Igsf11	1.23895	1
								Gm16178	1.23872	1
								Slfn2	1.23729	0.977857
								Grid1	1.23718	1
								Bmp2k	1.23681	0.197843
								Fam89a	1.23605	1
								Gm14889	1.23579	1
								1700008F21Rik	1.23579	1
								Nanp	1.23579	1
								Aoc2	1.23534	0.194765
								4930539E08Rik	1.23502	1
								Eif6	1.23481	0.389447
								S100a10	1.2348	0.846258
								Gm3534	1.23472	1
								Gm5627	1.23448	1
								1700029E06Rik	1.23403	1
								2010308F09Rik	1.23403	1
								Acrv1	1.23403	1
								Ascl4	1.23403	1
								Bco1	1.23403	1
								Cndp1	1.23403	1
								Ctsg	1.23403	1
								Dlx6	1.23403	1
								Frem2	1.23403	1
								Gm10250	1.23403	1
								Gm12194	1.23403	1
								Gm12760	1.23403	1
								Gm14121	1.23403	1
								Gm14673	1.23403	1
								Gm15697	1.23403	1
								Gm15974	1.23403	1
								Gm16416	1.23403	1
								Gm20417	1.23403	1
								Gm20445	1.23403	1
								Gm22935	1.23403	1
								Gm23639	1.23403	1
								Gm25000	1.23403	1
								Gm26457	1.23403	1
								Gm26594	1.23403	1
								Gm26756	1.23403	1
								Gm26827	1.23403	1
								Gm27572	1.23403	1
								Gm4793	1.23403	1
								Gm5415	1.23403	1
								Gm6292	1.23403	1
								Gm8579	1.23403	1
								Marveld2	1.23403	1
								Mir6929	1.23403	1
								RP23-136M3.5	1.23403	1
								RP24-65D16.4	1.23403	1
								Rcvrn	1.23403	1
								Rgs14	1.23403	1
								Rps12-ps1	1.23403	1
								Rps19-ps7	1.23403	1
								Serpina11	1.23403	1
								Slc10a2	1.23403	1
								Tuba3b	1.23403	1
								Uchl4	1.23403	1
								Zfp92	1.23403	1
								Siglec1	1.23376	1
								Gm26909	1.23349	1
								1700120C14Rik	1.23321	1
								Sag	1.23316	1
								Gm14057	1.23185	1
								Adam28	1.23039	1
								Zfp428	1.23011	0.133572
								Slc22a13b-ps	1.22945	1
								Sdc4	1.22935	1
								Tarm1	1.22884	1
								4933408N05Rik	1.22745	1
								Pxdc1	1.22536	1
								Gm22107	1.22531	1
								Gm10419	1.22443	1
								Clcf1	1.224	0.981817
								Aqp7	1.22319	1
								4933413G19Rik	1.22304	1
								Ggct	1.2229	0.0579962
								Mylk2	1.22216	0.064414
								Gm13340	1.22123	1
								Gm14735	1.2208	0.845611
								Myo15b	1.22068	1
								Ccdc103	1.21812	1
								Gm14584	1.21796	1
								Ppp1r42	1.21793	1
								Pgbd5	1.21771	1
								Irak3	1.21703	0.0687931
								Pdc	1.21702	1
								Fmo1	1.21661	1
								Dock3	1.21613	1
								Catsper3	1.21525	1
								Rpl31-ps20	1.21407	1
								Trav4-3	1.21377	1
								A530053M12Rik	1.21207	1
								Ppp4r4	1.21158	0.651457
								Slc20a1	1.21078	1
								Hsd17b14	1.21019	1
								Gab3	1.20997	1
								Lrrc31	1.20994	1
								Apobec2	1.20994	1
								BC016548	1.20994	1
								Ccdc50-ps	1.20994	1
								D030047H15Rik	1.20994	1
								E330017L17Rik	1.20994	1
								Gm13310	1.20994	1
								Gm21319	1.20994	1
								Gm28906	1.20994	1
								RP23-56B11.5	1.20994	1
								Rps19-ps6	1.20994	1
								Ido2	1.20908	1
								Ptpn22	1.20865	1
								Gm5265	1.20759	1
								Hpx	1.2074	0.682358
								Ptpre	1.20619	0.795634
								Esm1	1.2061	1
								Pcdh12	1.20608	1
								C920021L13Rik	1.20584	1
								Gm13216	1.20568	1
								Slc25a37	1.20523	0.734123
								Syne4	1.20449	1
								Nabp1	1.20449	0.144038
								Pydc3	1.20404	1
								Gm21917	1.20345	1
								Tnfaip6	1.20331	1
								Ccdc169	1.20267	1
								Spdef	1.20127	1
								Gm6611	1.20081	1
								Txndc2	1.19911	1
								Gar1	1.19828	0.669925
								Calr4	1.19682	1
								Gm15013	1.19573	1
								Gm8738	1.19521	1
								Tspan18	1.1945	1
								1700095J03Rik	1.19446	1
								Mroh6	1.19418	1
								Gm11478	1.19269	1
								Rasl12	1.19207	0.998515
								Plekhh1	1.19191	1
								Col6a4	1.19117	0.846258
								Galnt6	1.19079	1
								Gm15839	1.19064	1
								Wdr66	1.18967	0.920441
								Slc16a6	1.1887	1
								Timm10	1.18773	0.296164
								RP23-157J4.3	1.18714	1
								Clca2	1.18538	1
								Efcab12	1.18494	1
								Gm13292	1.18494	1
								Gm15405	1.18494	1
								Gm26520	1.18494	1
								Npc1l1	1.18494	1
								RP23-393C3.4	1.18494	1
								Sel1l3	1.18494	1
								4930597O21Rik	1.18363	1
								Hoxb5	1.18339	1
								Rrad	1.18189	0.247667
								Lilrb4	1.1817	1
								Nfatc2	1.18163	1
								Rpl39-ps	1.18129	1
								Sh2d1b2	1.1804	1
								Fam227b	1.17902	1
								Gpr179	1.17902	1
								Nalcn	1.17902	1
								Unc93a	1.17902	1
								Fam19a2	1.17887	1
								Gm13882	1.17748	1
								Parp10	1.17656	0.802928
								Grap	1.17625	1
								Fank1	1.17595	1
								Gm16436	1.17577	1
								Gm10125	1.17429	1
								Gm28875	1.17426	0.347403
								Cacna1i	1.174	1
								Twist2	1.17354	0.207253
								Gm11772	1.17309	1
								Gm8420	1.17284	1
								Rnf213	1.17261	0.0961521
								4632428C04Rik	1.17097	1
								Mpp3	1.16949	1
								Gm16163	1.16888	1
								Scn8a	1.16888	1
								Mcc	1.1688	0.362003
								Upk1a	1.16796	0.993443
								Hbegf	1.16712	0.979947
								Slc26a8	1.1669	1
								Col11a2	1.16491	0.793253
								Slc2a1	1.16369	0.544802
								Gm15531	1.1627	1
								Gm7701	1.16208	1
								1810008B01Rik	1.16085	1
								Ccdc150	1.16085	1
								Cyp2c65	1.16085	1
								RP24-485J8.3	1.16085	1
								Sycp1	1.16085	1
								Eva1a	1.16039	0.572282
								Slc14a1	1.16028	1
								Gprc5a	1.16015	1
								Tc2n	1.15923	1
								Gm12933	1.15816	1
								Zfp474	1.15807	1
								Atf3	1.15782	1
								Zfp389	1.15769	1
								Acap1	1.15751	1
								2410004N09Rik	1.15694	0.423264
								Fam19a3	1.15638	1
								Gm26533	1.15583	1
								Cd99	1.15553	1
								mt-Atp6	1.15444	0.846258
								Bloc1s4	1.15367	1
								Gng4	1.15351	1
								Ctrl	1.1523	1
								A230087F16Rik	1.15213	1
								Samd15	1.15203	1
								Naaladl1	1.15154	1
								Pcdh1	1.15102	0.1697
								Gm16241	1.15095	1
								4930562C15Rik	1.1507	1
								Atp6v1c2	1.1507	1
								Gm14342	1.1507	1
								Rs1	1.1507	1
								Prkcg	1.14973	1
								Cd37	1.14737	1
								RP23-7E4.2	1.14654	1
								Prr18	1.14581	1
								Pmepa1os	1.14519	1
								Gm2897	1.14477	1
								Rhov	1.14477	1
								Abcb1b	1.14476	0.452391
								Gm2824	1.14406	1
								Hdc	1.14383	1
								Ablim3	1.14238	0.605656
								RP23-5K7.4	1.14135	1
								Tuba1c	1.14039	0.795634
								A330069E16Rik	1.13968	1
								Gm15690	1.13938	1
								5730422E09Rik	1.13861	1
								Mapk6	1.13841	0.0988184
								Gm14494	1.13398	1
								Foxn1	1.13341	1
								4933406C10Rik	1.13338	1
								Tmem185b	1.13318	1
								2810008D09Rik	1.13306	0.526353
								Gm4189	1.13305	1
								4930570D08Rik	1.1326	1
								Snca	1.13001	1
								Serpina1f	1.12964	1
								Rpl3-ps1	1.12909	1
								Gm20900	1.12892	1
								Dlgap2	1.12721	1
								Gm23301	1.12661	1
								Ckm	1.12661	1
								Gm15584	1.12661	1
								Gm17046	1.12661	1
								Gm13559	1.1255	1
								Nxnl2	1.1255	1
								Tnfrsf18	1.12548	1
								Cd79a	1.12502	1
								Speer3	1.12339	1
								Cpne7	1.12329	1
								Kif2a	1.12248	0.0984269
								Gm16249	1.12223	1
								Akap2	1.12182	1
								Arhgap40	1.12182	1
								Lsamp	1.12182	1
								Gm12165	1.12129	1
								Tnnc1	1.12118	1
								Vmn1r65	1.12107	1
								Frat2	1.12097	1
								Nrg1	1.11845	0.941841
								Esyt3	1.11709	1
								Rsbn1	1.11686	0.0814339
								Gm12141	1.11626	1
								Gm8822	1.11557	1
								RP24-273P12.4	1.11335	1
								Tpm3-rs7	1.11259	1
								1700067K01Rik	1.11257	1
								1810043H04Rik	1.11253	1
								Gm15265	1.11164	1
								Ovgp1	1.11159	1
								Serp2	1.1098	0.795634
								Spry2	1.10953	0.158038
								Fam129c	1.10854	0.51673
								RP24-227F14.1	1.10828	1
								Gm11175	1.10572	1
								Ccdc88b	1.10562	0.965059
								Jund	1.10491	1
								Pstpip2	1.10471	1
								Msh5	1.10457	1
								Rbpj	1.10396	0.0814339
								Cdh23	1.10358	1
								Stk32c	1.10273	0.603908
								Gm7785	1.1024	1
								Rasl10a	1.10089	1
								Gm11520	1.10087	1
								Gm12925	1.1008	1
								Gpr35	1.10045	1
								Gm15566	1.09975	1
								Crybb3	1.09882	1
								Sipa1l2	1.09762	0.22768
								Samd11	1.09745	1
								Gm13613	1.09699	1
								Prss2	1.09691	1
								Apobr	1.09685	0.585953
								2010107G12Rik	1.09646	1
								C330013E15Rik	1.09609	1
								Gm15866	1.09507	1
								RP23-426D21.2	1.09433	1
								Uchl1	1.09423	1
								AI847159	1.09363	1
								Znrf1	1.09291	0.105408
								Mall	1.09235	1
								Gm17484	1.09049	1
								Guca1a	1.08981	0.675571
								Plaur	1.08965	1
								Rpsa-ps12	1.0893	1
								Msh4	1.08925	1
								Cd82	1.08904	1
								Mannr	1.08861	1
								Sat1	1.0886	0.0963605
								H2-T22	1.08851	0.0853271
								Hcar1	1.08829	1
								Tgif1	1.08794	0.452956
								Gm20400	1.08783	0.22768
								Gsta3	1.08652	1
								H2-K1	1.08613	0.665399
								Cfap54	1.08604	1
								Gm16998	1.08428	1
								Filip1	1.08423	1
								Gm28386	1.08423	1
								4933433G15Rik	1.08377	1
								RP23-160G19.9	1.08337	1
								Fam169a	1.08324	1
								Gm16630	1.08319	1
								Gm11665	1.08307	1
								Pyhin1	1.08284	1
								Rps19-ps9	1.0826	1
								Tnfrsf21	1.08177	0.148791
								Zcchc12	1.08039	1
								Ttc30a2	1.07925	1
								Uap1	1.07889	0.131726
								Junb	1.0767	1
								RP23-463E8.1	1.07586	1
								Unc80	1.07561	1
								Bmp7	1.07558	1
								RP23-85E24.2	1.07507	1
								4930524O07Rik	1.07457	1
								Rrs1	1.07324	0.108995
								Apoa1	1.07296	1
								Gm12352	1.07292	1
								Jun	1.07279	0.249766
								Papd5	1.0708	0.110225
								Ablim2	1.07066	1
								RP23-256D19.3	1.07044	1
								Gm11857	1.07033	1
								Pip5kl1	1.06901	1
								Gm14336	1.06803	1
								Gm15427	1.068	1
								Arv1	1.0676	0.780403
								Dok3	1.06658	1
								Zdhhc18	1.06651	1
								Ampd3	1.06631	0.646761
								4930448E22Rik	1.0661	1
								Gm26826	1.0661	1
								Tnfsf9	1.06583	0.45006
								Gm23547	1.06581	1
								Il20rb	1.06462	0.620106
								Ppp1r3f	1.06412	1
								Ptger4	1.06404	0.63252
								Mertk	1.06396	1
								Arid3b	1.06344	0.81167
								RP24-393L8.1	1.06341	1
								Gm6132	1.06324	1
								2010300F17Rik	1.06302	1
								1700069B07Rik	1.06226	1
								A430093F15Rik	1.06226	1
								A930006I01Rik	1.06226	1
								Aqp9	1.06226	1
								Clec4a2	1.06226	1
								Dbhos	1.06226	1
								Dgat2l6	1.06226	1
								Fam184b	1.06226	1
								Gm10155	1.06226	1
								Gm10335	1.06226	1
								Gm12353	1.06226	1
								Gm12988	1.06226	1
								Gm13422	1.06226	1
								Gm13783	1.06226	1
								Gm15104	1.06226	1
								Gm15782	1.06226	1
								Gm17097	1.06226	1
								Gm17108	1.06226	1
								Gm2467	1.06226	1
								Gm26790	1.06226	1
								Gm4461	1.06226	1
								Gm4952	1.06226	1
								Gm6097	1.06226	1
								Gm7863	1.06226	1
								Gm9423	1.06226	1
								Gpr152	1.06226	1
								Hnf1b	1.06226	1
								Hpgds	1.06226	1
								Il7r	1.06226	1
								Kcna6	1.06226	1
								Kcne3	1.06226	1
								Lrrc69	1.06226	1
								Npsr1	1.06226	1
								Oxt	1.06226	1
								RP23-264E23.1	1.06226	1
								RP23-285F13.2	1.06226	1
								RP24-422C24.3	1.06226	1
								Rgsl1	1.06226	1
								Rpl7a-ps10	1.06226	1
								Rps10-ps2	1.06226	1
								Rps2-ps13	1.06226	1
								Rps2-ps6	1.06226	1
								Rps23-ps1	1.06226	1
								Slc13a3	1.06226	1
								Snord45b	1.06226	1
								Svs3a	1.06226	1
								Synpr	1.06226	1
								Tnfsf4	1.06226	1
								Hk2	1.06125	0.0782161
								Gm6341	1.06114	1
								Ly6i	1.06109	1
								Gm12129	1.06087	1
								Ppp1r14c	1.06084	1
								Tgfb1	1.06083	0.181578
								Gm10425	1.0604	0.984313
								Mycbpap	1.05987	1
								Irf7	1.05894	1
								Asic1	1.0575	1
								Atp5l-ps2	1.05728	1
								Gmfg	1.05586	1
								Plek	1.05532	0.650063
								1700102P08Rik	1.05426	1
								Tlr7	1.05258	1
								Trp53rk	1.05133	0.658088
								Tnfaip8	1.05096	1
								Fam228a	1.05095	1
								Apon	1.05017	1
								Gm26647	1.05017	1
								Lat2	1.05003	0.966317
								Gem	1.04981	1
								Yrdc	1.0494	0.698846
								Adm2	1.04892	1
								Rpsa-ps11	1.04879	1
								Pdf	1.04752	1
								Rpl31-ps14	1.04687	1
								Cd33	1.04616	1
								Ms4a6c	1.04543	1
								Arhgef3	1.04484	0.737724
								Blcap	1.04459	0.131408
								Gm11249	1.04415	1
								THAP6	1.044	0.22768
								Ifrd1	1.04391	0.0976673
								Rab3c	1.04314	1
								BC001981	1.04247	1
								Gm2383	1.04236	1
								4732419C18Rik	1.03946	1
								Nrxn2	1.03826	1
								2900092C05Rik	1.03818	1
								Gm5564	1.03818	1
								Gm5745	1.03818	1
								Gm9850	1.03818	1
								Magix	1.03818	1
								Trim14	1.03818	1
								BC048644	1.0379	1
								Gm12521	1.03682	1
								Gm12038	1.03588	1
								4930506M07Rik	1.03543	1
								RP24-147G7.2	1.03437	1
								Igfbp3	1.03406	1
								Adamts8	1.03263	1
								Gm10689	1.03254	1
								Prr13	1.03231	0.101226
								RP24-339P17.3	1.03208	1
								Gm28592	1.03186	1
								Six2	1.03169	1
								Pvr	1.0305	0.0673837
								Gm5045	1.03019	1
								Pdlim4	1.03015	0.649287
								Cpb1	1.02989	1
								Odc1	1.02989	0.197843
								Crispld1	1.02977	0.60075
								Maff	1.02845	0.846258
								RP24-366E11.2	1.02818	1
								Acrbp	1.0274	1
								Gm4787	1.02726	1
								6430590A07Rik	1.02697	1
								Ubl4b	1.02624	1
								Gm4217	1.0255	1
								1700113A16Rik	1.0254	1
								Srgap1	1.02498	0.362744
								Xirp2	1.02467	1
								Gm7799	1.02452	1
								Ap1m2	1.02404	1
								Slc35g2	1.02359	0.307131
								Epha5	1.02316	1
								Rps25-ps1	1.023	1
								Snrpf	1.02288	0.869906
								Stac3	1.02237	1
								Pde6h	1.02234	1
								Kdm5d	1.0218	1
								Bcl10	1.02166	0.393225
								Dqx1	1.02125	0.912469
								Taco1os	1.02064	1
								Adarb1	1.01841	0.279992
								Car2	1.01798	1
								Megf11	1.01643	1
								Gm18294	1.01583	1
								Gm15365	1.01501	1
								Hectd2	1.01471	0.251703
								Crem	1.01404	0.258315
								Abtb2	1.01391	0.148791
								Gm27030	1.01097	1
								Rwdd2a	1.01062	1
								Rhog	1.0105	0.215395
								Cdk5r1	1.01048	1
								Hpdl	1.01046	1
								Syne1	1.0092	1
								Pgd	1.00834	0.122227
								RP23-75G11.4	1.00828	1
								Slc2a4rg-ps	1.00824	0.526353
								Mmp25	1.00773	1
								Gm15344	1.00753	1
								Glul	1.00742	0.14494
								Rplp2	1.00727	0.428459
								Rpl27-ps1	1.00681	1
								Gm1070	1.00659	1
								Rpl32-ps	1.00532	1
								Lrrfip2	1.00451	0.526353
								Gchfr	1.00434	1
								Myo1a	1.00389	1
								Btc	1.00387	1
								RP23-193J20.4	1.0038	1
								Gm16061	1.00288	1
								Qtrtd1	1.00252	0.414226
								Dhx58	1.00222	0.846258
								Grik4	1.00214	1
								Alox5ap	1.00192	1
								Mphosph6	1.00088	1
								Orai1	1.00055	0.424134
								Eaf1	1.0001	0.278772
								Gm6433	0.999692	1
								Slc5a4b	0.999413	1
								Fgfr1op	0.999223	0.278772
								Tmem243	0.998944	1
								Ap3m1-ps	0.998906	1
								mt-Nd3	0.99777	1
								Tbx6	0.997262	1
								Tmem158	0.997067	1
								Hopx	0.996868	1
								Asgr1	0.996555	1
								Gm17586	0.99631	0.9467
								Gm12359	0.995281	1
								RP24-88F2.2	0.994695	1
								Gm11769	0.994516	0.926033
								Muc2	0.994099	1
[truncated: 16,274 more rows]
